# Supplementary material
Source: Springer Nature journal article supplement (https://www.springermedizin.de/resource/supplementary/12885_2009_1525_MOESM2_ESM.pdf/9472236)

MUC1

DAPI

Merge

panc02-Neo

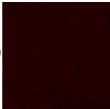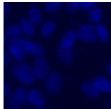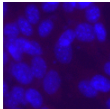

panc02-MUC1

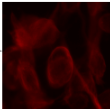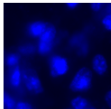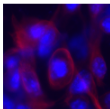

Supplement: MOESM2 [file 9472236]
